# Supplementary material
Source: MDPI journal article supplement (https://www.mdpi.com/2073-4433/10/12/789)

# Supplementary Materials: Aerosol from Biomass Combustion in Northern Europe: Influence of Meteorological Conditions and Air Mass History

Jun Noda <sup>1,2</sup>, Robert Bergström <sup>1,3,4</sup>, Xiangrui Kong <sup>1</sup>, Torbjörn L. Gustafsson <sup>1</sup>,  
Borka Kovacevik <sup>1,5</sup>, Maria Svane <sup>1,6</sup>, and Jan B. C. Pettersson <sup>1,6,\*</sup>

<sup>1</sup> Department of Chemistry and Molecular Biology, Atmospheric Science, University of Gothenburg, SE-412 96 Gothenburg, Sweden;

<sup>2</sup> School of Veterinary Medicine, Rakuno Gakuen University, Ebetsu, Hokkaido 069-8501, Japan;

<sup>3</sup> Swedish Meteorological and Hydrological Institute, SE-601 76 Norrköping, Sweden;

<sup>4</sup> Department of Space, Earth and Environment, Chalmers University of Technology, SE-412 96 Gothenburg, Sweden;

<sup>5</sup> Belnigo Consulting, str.Boris Sarafov 42/2/8, Skopje, RN, Macedonia;

<sup>6</sup> Gothenburg Centre for Sustainable Development, GMV Chalmers University of Technology & University of Gothenburg, Aschebergsgatan 44, SE-412 96 Göteborg, Sweden;

\* Correspondence: [janp@chem.gu.se](mailto:janp@chem.gu.se)

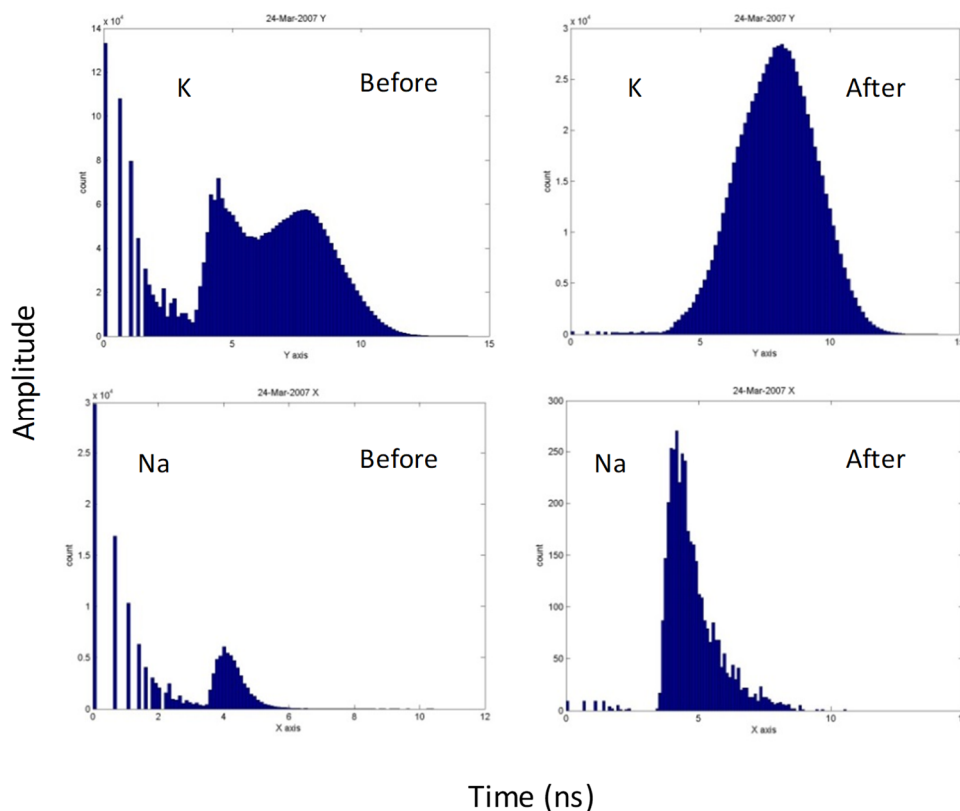

**Figure S1.** Examples of Na and K spectra before and after noise reduction treatment.

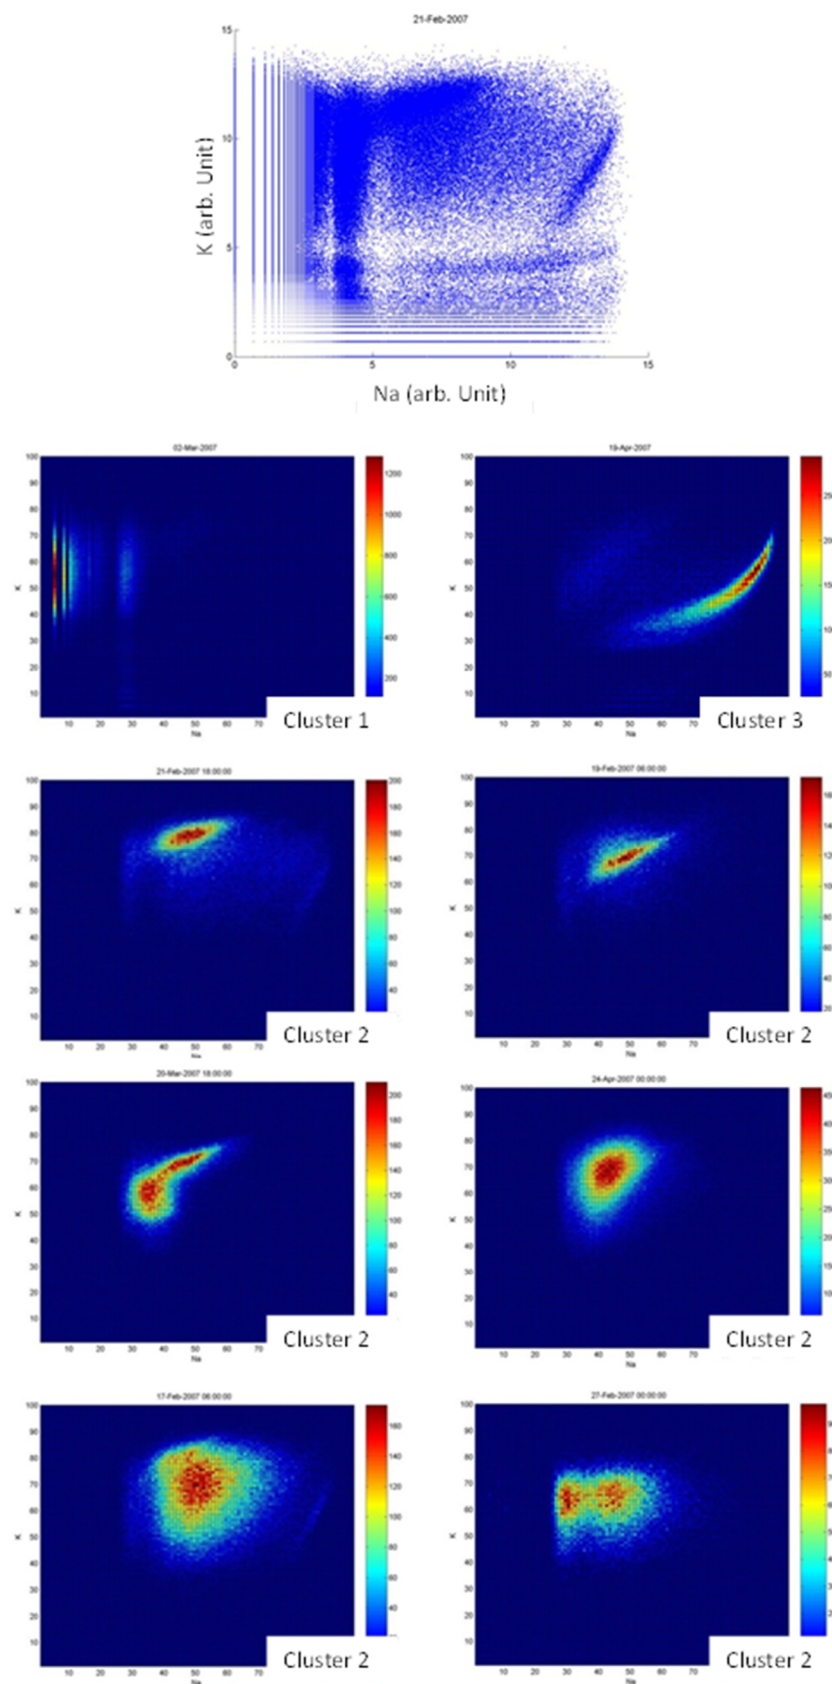

**Figure S2.** Illustrations of spectra dominated by different clusters shown in color map. Different sub-modes are included in cluster 2. The sampling period for each map is 6 hours.

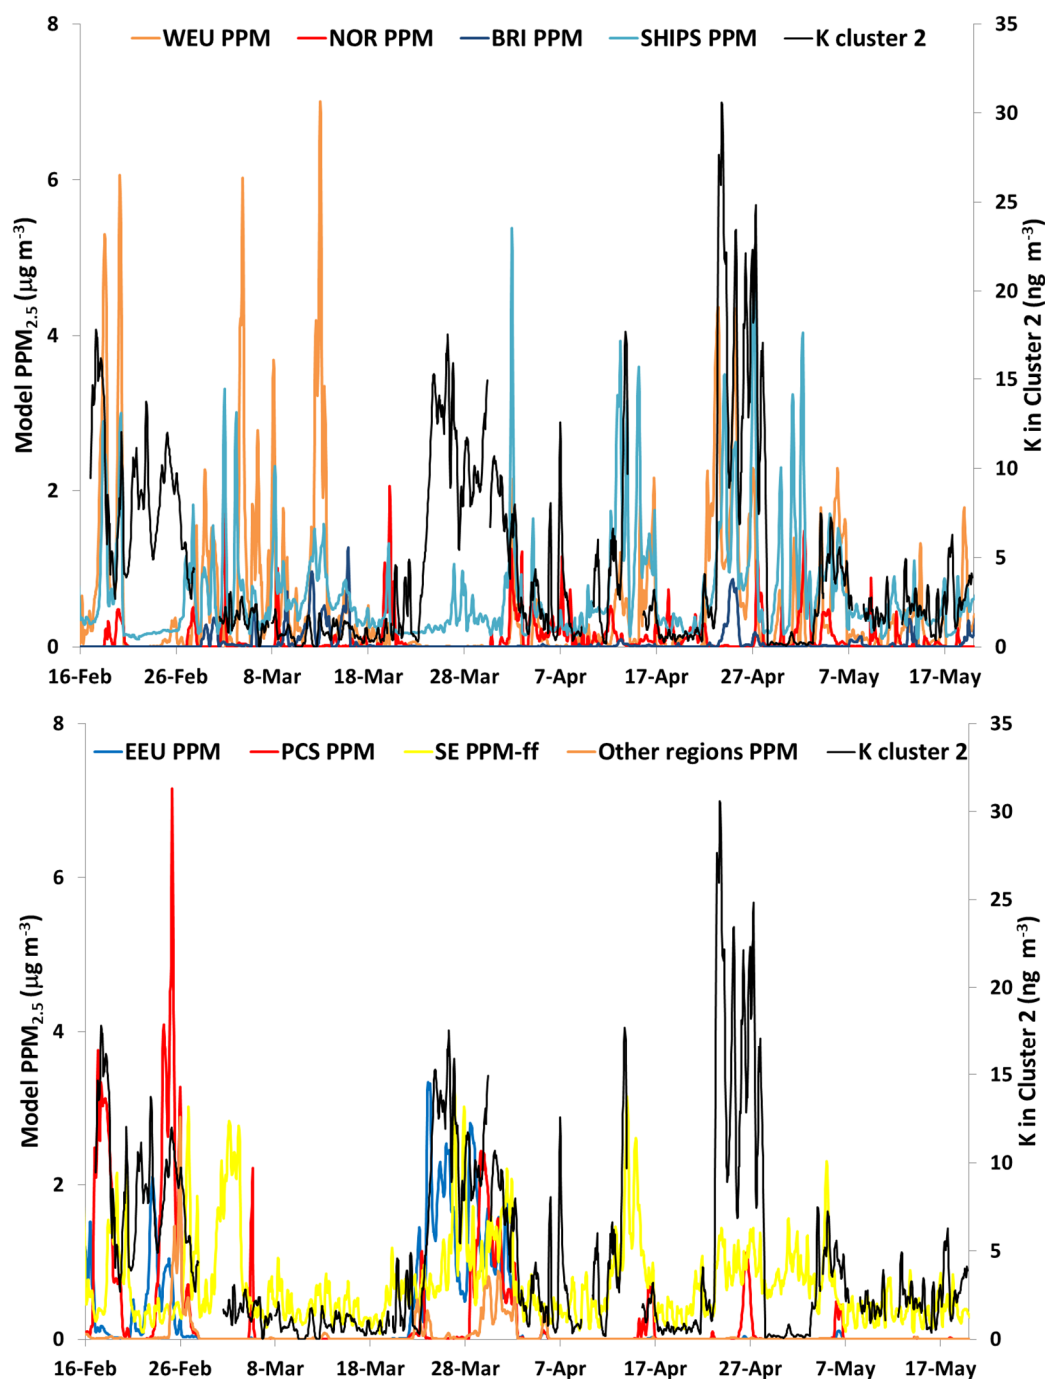

**Figure S3.** Modeled (hourly average) primary PM<sub>2.5</sub> (PPM<sub>2.5</sub>) from different regions and measured (6-h average) concentrations of K in Cluster 2. The upper panel shows modeled PPM<sub>2.5</sub> from WEU = Denmark, Germany, BeNeLux and France (orange line); NOR = Norway (red); BRI = UK and Ireland (blue); SHIPS = international shipping (turquoise). The lower panel shows modeled PPM<sub>2.5</sub> from EEU = Russia, Belarus, the Baltic states, Finland and Ukraine (blue line); PCS = Poland, Czechia and Slovakia (red); Other = all other non-Swedish regions (mainly central and southern Europe) (orange), and modeled PPM from fossil fuel sources in Sweden (SE PPM-ff, yellow line). The measured K concentration in Cluster 2 is shown in both panels (black line). Units, model results: µg m<sup>-3</sup>; measurements: ng K m<sup>-3</sup>.

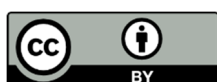

Supplement: s1 [file s1]
